# Supplementary material
Source: publisher figshare collection journal article supplement (https://karger.figshare.com/articles/dataset/_/6844496)
Supplement: Supplementary file 1 [file 1 › JIN490586_FigS2.pdf]

## Supplementary Fig. 2

### Effect of TLR3 activation on IFN regulatory factors (IRFs).

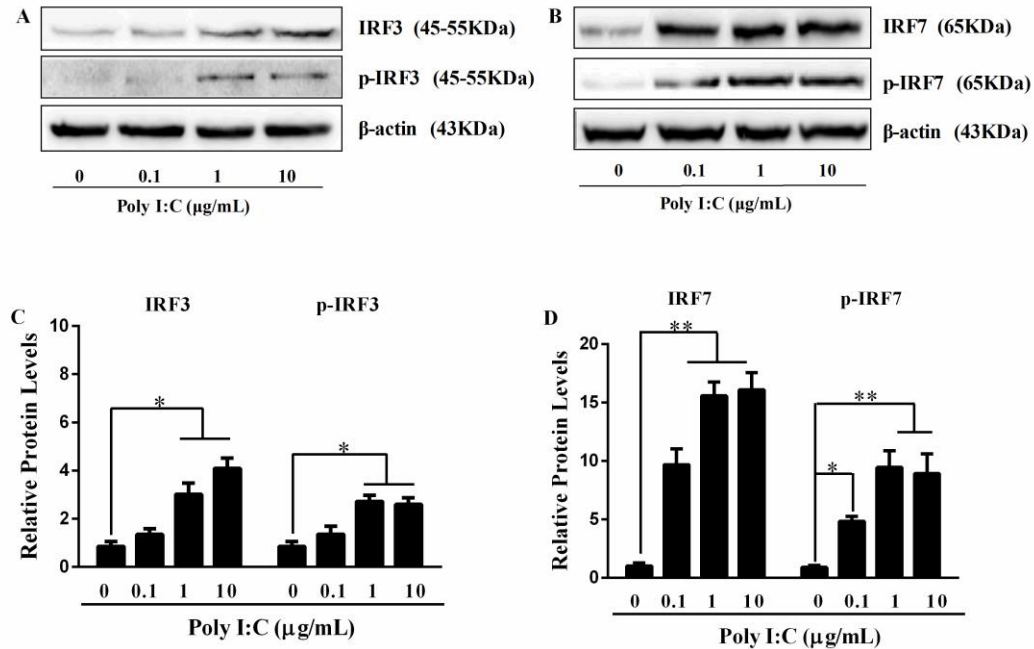

(A, B) End1/E6E7 cells were transfected with or without Poly I:C at different concentrations (0.1, 1, 10  $\mu\text{g/mL}$ ) for 24 h. Nuclear lysates were prepared and subjected to Western blot analyses for IRF3, p-IRF3, IRF7 and p-IRF7. (C, D) Densitometry analysis of relative IRF3, p-IRF3, IRF7 and p-IRF7 levels compared with  $\beta$ -actin was performed by ImageJ 1.44 software. All experiments were repeated three times with similar results. Bar graphs represent the mean  $\pm$  SD (\* $P < 0.05$ , \*\* $P < 0.01$ ).
