# Supplementary material
Source: publisher figshare collection journal article supplement (https://karger.figshare.com/articles/dataset/_/6844496)
Supplement: Supplementary file 1 [file 1 › JIN490586_TableS1.pdf]

**Supplementary Table 1. Primer Sets for Real-time PCR**

| Primer             | Accession No.           | Orientation | Sequences                          | Product (bp) |
|--------------------|-------------------------|-------------|------------------------------------|--------------|
| GAPDH              | NM_002046               | Sense       | 5'-GGTGGTCTCCTCTGACTTCAACA-3'      | 127          |
|                    |                         | Antisense   | 5'-GTTGCTGTAGCCAAATTCGTTGT-3'      |              |
| IFN- $\alpha$      | NM_002173.3             | Sense       | 5'-TTTCTCCTGCCTGAAGGACAG-3'        | 372          |
|                    |                         | Antisense   | 5'-CTCATGATTTCTGCTCTGACA-3         |              |
| IFN- $\beta$       | NM_002176               | Sense       | 5'-GCCGCATTGACCATCTATGAGA-3'       | 346          |
|                    |                         | Antisense   | 5'-GAGATCTTCAGTTTCGGAGGTAAC-3      |              |
| IFN- $\lambda$ 1   | NM_172140               | Sense       | 5'-CTTCCAAGCCCACCCCAACT-3'         | 142          |
|                    |                         | Antisense   | 5'-GGCCTCCAGGACCTTCAGC-3'          |              |
| IFN- $\lambda$ 2/3 | NM_172138/<br>NM_172139 | Sense       | 5'-TTTAAGAGGGCCAAAGATGC-3'         | 267          |
|                    |                         | Antisense   | 5'-TGGGGCTGAGGCTGGATACAG-3'        |              |
| IRF3               | NM_001571               | Sense       | 5'-ACCAGCCGTGGACCAAGAG-3'          | 60           |
|                    |                         | Antisense   | 5'-TACCAAGGCCCTGAGGCAC-3'          |              |
| IRF7               | NM_001572               | Sense       | 5'-TGGTCCTGGTGAAGCTGGAA-3'         | 134          |
|                    |                         | Antisense   | 5'-GATGTCGTCATAGAGGCTGTTGG-3'      |              |
| TLR3               | XM_017008577.1          | Sense       | 5'-GTCTGGGAACATTTCTCTTC-3'         | 311          |
|                    |                         | Antisense   | 5'-GATTTAAACATTCCTCTTCGC-3'        |              |
| MIP1- $\alpha$     | NM_002983               | Sense       | 5'-GCTGACTACTTTGAGACGAGC-3'        | 232          |
|                    |                         | Antisense   | 5'-CCAGTCCATAGAAGAGGTAGC-3'        |              |
| MIP1- $\beta$      | NM_002984               | Sense       | 5'-CCAAACCAAAAGAAGCAAGC-3'         | 314          |
|                    |                         | Antisense   | 5'-AGAAACAGTGACAGTGGACC-3'         |              |
| RANTES             | NM_002985               | Sense       | 5'-CTGCATCTGCCTCCCCATA-3'          | 62           |
|                    |                         | Antisense   | 5'-GCGGGCAATGTAGGCAAA-3'           |              |
| ISG15              | NM_005101               | Sense       | 5'-GGCTGGGACCTGACGGTGAAG-3'        | 492          |
|                    |                         | Antisense   | 5'-GCTCCGCCCGCCAGGCTCTGT-3'        |              |
| ISG56              | NM_001270930            | Sense       | 5'-TTCGGAGAAAGGCATTAGA-3'          | 85           |
|                    |                         | Antisense   | 5'-TCCAGGGCTTCATTCATAT-3'          |              |
| OAS-1              | NM_001032409            | Sense       | 5'-AGAAGGCAGCTCACGAAACC-3'         | 71           |
|                    |                         | Antisense   | 5'-CCACCACCAAGTTTCCTGTA-3'         |              |
| OAS-2              | XM_011538415.1          | Sense       | 5'-CAGTCCTGGTGAGTTTGCAGT-3'        | 146          |
|                    |                         | Antisense   | 5'-ACAGCGAGGGTAAATCCTTGA-3'        |              |
| MxA                | XM_005260982.2          | Sense       | 5'-GCCGGCTGTGGATATGCTA-3'          | 69           |
|                    |                         | Antisense   | 5'-TTTATCGAAACATCTGTGAAAGCAA-3'    |              |
| MxB                | XM_005260983.4          | Sense       | 5'-CAGCAGACGATCAACTTGGTG-3'        | 159          |
|                    |                         | Antisense   | 5'-CATGACGCTTTTCTCAGTGCC-3'        |              |
| GBP5               | NM_001134486.2          | Sense       | 5'-TGGCAAATCCTACCTGATGA-3'         | 97           |
|                    |                         | Antisense   | 5'-CCATATCCAAATTCCTTGG-3'          |              |
| HIV gag            | KY521529                | Sense       | 5'-ATAATCCACCTATCCCAGTAGGAGAAA-3'  | 115          |
|                    |                         | Antisense   | 5'-TTTGGTCCTTGTCTTATGTCCAGAATGC-3' |              |
| HIV LTR            | AY352275.1              | Sense       | 5'-TCTCTCTGGTTAGACCAGATCTG-3'      | 180          |
|                    |                         | Antisense   | 5'-ACTGCTAGAGATTTTCCACACTG-3'      |              |

|       |                |           |                               |     |
|-------|----------------|-----------|-------------------------------|-----|
| STAT1 | NM_007315      | Sense     | 5'- CCGTGGCACTGCATACAATC-3'   | 187 |
|       |                | Antisense | 5'-ACCATGCCGAATTCCCAAAG-3'    |     |
| STAT2 | XM_017019904.1 | Sense     | 5'- CCCCATCGACCCCTCATC -3'    | 69  |
|       |                | Antisense | 5'- GAGTCTCACCAGCAGCCTTGT -3' |     |
| STAT3 | NM_003150      | Sense     | 5'-CTGCCCCATACCTGAAGACC-3'    | 162 |
|       |                | Antisense | 5'-TCCTCACATGGGGGAGGTAG-3'    |     |

---
